# Supplementary material for: Exploring the systemic impacts of urinary tract infection-specific antibiotic treatments on the gut microbiome, metabolome, and intestinal morphology in rats
Source: PeerJ. 2025 Jun 9;13:e19486. doi: 10.7717/peerj.19486 (PMC12161137; doi:10.7717/peerj.19486)
Supplement: Supplemental Information 3 [file peerj-13-19486-s003.xlsx]

## Sheet: Sheet1
#OTU ID	000d582f94b6b56e312217b06dda9648	0013b8c60f1e6d2e2ec1db5b3e145d68	0058417d43794d415b68dab8fb936a19	00c2d16612179817be2c7d2553e0a1bb	0124581f6ab02cdf8f64384fe79d756f	015a93fd1ce1e1735ee14272d39c4401	017d2d129c3c3d4d71a5039ab79ea614	01f4a3adc32b064f4431e5e1bd41a651	0251e5e53160fb39c9a25605a46a85a9	02a695b62f62ad911012b99b7c2d5b72	02afee480f6d705909f54f592bd01917	037edbd6e3e6a9022fab32ef61e0d8b4	03bd679804f7dcb6ab710b54718ea9ae	03f57aaf62e17e209cb9b235513bb3e7	049af104e7070d63976f2583270eff0c	04de0351c72c33bc042ed9a1f6c1aef4	0501dcb0c89c2a4392ddfdd8ca8281e5	056c9aaa97749f8a5d5e2180e57ad467	06059ff33fb547d922a773c8c071a17e	0667dbc0cec01722bf9579d113d2af44	06915ad4f96fb649145388f5f1d9803a	06b3993263d270a99408cba370e62ef3	071e4e4db032618f0e6f2845f9ff216d	085fa47b959422fede624b2e20a780eb	085fb42005f357d1956dfed601687bc5	087d17c09b29f038482b5f91ac4882db	087ff71db41b1c36a0d7bce82975028d	089ec4b7b7a8878cfc5464a9cd462051	08b22053f10b471988e65617be92a513	0967c646ab460eec2a6e5b1240d693b4	097f2f950a6a7d17ffe6dbeb12e8c862	098dbad2c4f135c6c24faa46d4c0cd2f	0992d0d94f28250a15c1bee3f1f60743	0a14357a03101b2db9f4117e3d3ba86c	0a96caaf7b0cb816477e17914ea223e6	0b1aae0f643a9cadb27062be1541e005	0b1e99e1673bcc9b5209541e5c0efb68	0b43a4a0c33d874be2d6da0c85e87214	0b9c7a8b8b2d1ba824245f20028c2bb2	0bc881d3cebdd18c204517d19b50b828	0bd082a3c38a4049c4ddd6d5e36a737a	0c468d738b8d3cb22d306d171cde2e26	0c927817675e51a227313e2f1d10586f	0d52e5ea56daeb9a98a445cacef1b3fc	0d58476929d351706d07b17579df5f29	0da34ace7bfff65f76fdbf81c5cbc31e	0e038bc1aa59614901f3e9cb5e816c26	0e7cba1c52e179df507446cd860a7b2a	0ed6d8d26ccc501f7aff42bda496eb5e
Rat229F	0	0	0	0	0	0	0	0	0	0	0	0	0	0	0	0	0	0	0	0	0	1	0	0	0	0	0	0	0	0	0	0	0	0	0	0	0	0	0	0	0	0	0	0	0	0	0	0	0
Rat231F	0	0	0	0	0	0	0	0	0	0	0	0	0	0	0	0	0	0	0	0	0	0	0	0	0	0	0	0	0	0	0	0	0	0	0	0	0	0	0	0	0	0	0	0	0	0	0	0	0
Rat423F	0	0	0	0	0	0	0	0	0	0	0	0	0	0	0	0	0	0	0	0	0	0	0	0	0	0	0	0	0	2	0	0	0	0	0	0	0	0	0	0	0	0	0	0	0	0	0	0	0
Rat424F	0	0	0	0	0	0	0	0	0	0	0	0	0	0	0	0	0	0	0	0	0	0	0	0	0	0	0	0	0	0	0	0	6	0	0	0	0	0	0	0	0	0	0	0	0	0	0	1	0
Rat428F	0	0	0	0	0	0	0	0	0	0	0	0	0	0	0	0	0	0	0	0	0	0	0	0	0	0	0	0	0	0	0	0	0	0	0	0	0	0	0	0	0	0	0	0	0	0	0	0	0
Rat429F	0	0	0	0	0	0	0	0	0	0	0	0	0	0	0	0	0	0	0	0	0	0	0	0	0	0	0	0	0	0	0	0	0	0	0	0	0	0	0	0	0	0	0	0	0	0	64	0	0
Rat430F	0	0	0	0	0	0	0	0	0	0	0	0	0	0	0	0	0	0	0	0	0	0	0	0	0	0	0	0	0	0	0	0	0	0	0	0	0	0	0	0	0	0	0	0	0	0	0	0	0
Rat431F	0	0	0	0	0	0	0	0	0	0	0	0	0	0	0	0	0	0	0	0	0	0	0	0	0	0	0	0	0	0	0	0	0	0	0	0	0	0	0	0	0	0	0	0	0	0	0	0	0
Rat432F	0	0	0	0	0	0	0	0	0	0	0	0	0	0	0	0	0	0	0	0	4248	0	0	0	0	0	0	0	0	0	0	0	0	0	0	0	0	0	0	0	0	0	0	0	0	0	0	0	0
Rat204F	0	21	5078	0	0	0	0	1773	0	0	0	0	0	0	0	0	0	0	0	0	0	0	0	0	0	0	0	216	0	0	0	0	0	0	0	0	0	0	0	0	0	0	0	0	0	0	0	0	0
Rat212F	47	269	0	0	0	0	0	1926	0	0	0	0	0	0	65	0	0	64	0	0	0	0	0	0	0	0	0	9	0	0	0	0	0	0	0	0	0	0	0	0	0	39	0	0	0	6	0	0	0
Rat214F	0	105	27	0	0	0	0	1235	0	0	0	0	0	0	0	0	0	0	0	0	0	0	0	0	0	0	0	54	0	0	0	0	0	0	0	0	0	0	0	0	0	0	0	0	0	0	0	0	0
Rat281F	0	331	134	0	34	0	0	588	0	0	0	0	0	0	0	0	0	43	0	0	0	0	0	0	0	5	0	82	0	0	0	0	0	0	0	23	0	0	0	0	0	202	0	0	0	0	0	0	0
Rat282F	58	242	430	3	24	0	0	119	0	0	0	0	0	0	0	0	0	55	0	0	0	0	0	0	128	0	0	41	0	0	0	0	0	0	0	0	0	0	0	0	0	0	0	0	0	0	0	0	0
Rat283F	0	1079	381	0	207	0	0	0	0	0	0	0	0	0	0	0	0	0	0	0	0	0	0	0	0	0	0	23	0	0	0	0	0	0	0	215	0	0	0	0	0	1306	0	0	0	0	0	0	0
Rat284F	0	241	196	0	0	0	0	178	0	0	0	0	0	0	0	0	0	0	93	0	0	0	0	0	0	0	0	9	0	0	0	0	0	0	0	12	0	0	0	0	0	92	0	0	0	0	0	0	0
Rat285F	143	1119	311	0	32	0	0	0	0	0	0	0	0	0	0	0	0	37	0	0	0	0	0	0	534	0	0	6	0	0	0	0	0	0	0	16	0	0	0	0	0	20	0	0	0	0	0	0	0
Rat286F	0	685	738	0	572	0	0	0	0	0	0	0	0	0	0	0	0	0	0	0	0	0	0	0	9	1	0	137	0	0	0	0	0	0	0	0	0	0	0	0	0	186	0	0	0	0	0	0	0
Rat269F	0	0	30	0	0	0	0	0	0	0	0	0	0	0	0	0	0	0	148	0	0	0	0	0	0	0	0	0	0	0	0	0	0	0	0	44	0	0	0	0	2	94	0	0	26	0	0	0	0
Rat403F	0	181	111	0	0	0	0	11661	0	0	0	0	0	0	0	0	0	90	0	0	0	0	0	0	36	0	0	0	0	0	0	0	0	0	0	0	0	0	0	0	0	13	0	0	8	0	0	0	0
Rat408F	0	37	117	0	0	0	0	0	0	0	0	0	0	0	0	0	0	429	156	0	0	2	0	0	314	0	0	0	0	0	0	0	0	0	0	50	0	0	0	0	0	33	0	0	124	0	0	0	0
Rat409F	37	0	0	0	0	0	0	0	0	0	0	0	0	0	57	0	0	25	1919	0	0	0	0	0	0	0	0	1	0	0	0	0	0	0	0	16	0	0	0	0	0	13	0	0	93	0	0	0	0
Rat411F	0	0	33	0	0	0	0	0	0	0	0	0	0	0	30	0	0	476	866	0	0	1	0	0	21	0	0	17	0	0	0	0	0	0	0	59	0	0	0	0	0	57	0	0	313	0	0	0	0
Rat413F	0	0	229	0	0	0	0	0	0	0	0	0	0	0	72	0	0	110	3008	0	0	0	0	0	0	0	0	0	0	0	0	0	0	0	0	0	0	0	0	0	0	67	0	0	115	0	0	0	0
Rat416F	0	0	106	3	0	0	0	446	0	0	0	0	0	0	0	0	203	45	689	0	0	0	0	0	271	2	0	1	0	0	0	0	0	0	0	0	0	0	0	0	0	12	0	0	2271	0	0	0	0
Rat417F	0	0	1117	0	0	0	0	0	0	0	0	0	0	0	16	0	0	28	670	0	0	0	0	0	73	1	0	3	0	0	0	0	0	0	0	44	0	0	0	0	0	290	0	0	2525	0	0	0	0
Rat418F	0	70	0	0	0	0	0	6910	0	0	0	0	0	0	0	0	0	723	214	0	0	0	0	0	0	0	0	9	0	0	0	0	0	0	0	181	0	0	0	0	0	54	0	0	511	0	0	0	0
[truncated: 844 more columns]
